# Supplementary material for: Consistency of plasma glucagon levels in patients with type 1 diabetes after a 1‐year period
Source: PubMed Central journal article supplement — J Diabetes Investig. 2019 Sep 18;11(2):337–40. doi: 10.1111/jdi.13134 (PMC7078088; doi:10.1111/jdi.13134), 2019-09-18
Supplement: JDI-11-337-s001.pdf [file JDI-11-337-s001.pdf]

## **Supplemental Method**

### **Study population**

A total of 77 Japanese patients with type 1 diabetes, who received the annual checkup in 2018, were recruited and enrolled in the present study after providing written informed consent. All participants were diagnosed as type 1 diabetes by diabetes specialists at the time of presenting hyperglycemia and/or ketosis in their clinical history, and since that time all had been under treatment with insulin therapy. Most of the participants are considered to be the auto-immune, acute-onset type 1 diabetes, but the inclusion of the fulminant type patients cannot be completely excluded when they are diagnosed before the establishment of the concept and diagnostic criteria of the fulminant type 1 diabetes. The patients with neoplasm, and administration of oral anti-diabetic agents were excluded.

### **Preparation of plasma samples for glucagon assay**

Whole blood was collected into sample tubes containing aprotinin and EDTA-2Na (NP-EA0205; NIPRO, Osaka, Japan), then immediately chilled on ice. Within 20 min of sampling, the plasma was separated using a 3,000-rpm desktop centrifuge for 20 min at 4 °C, then stored in a -80 °C deep freezer until performing the glucagon assay.

### **Acknowledgments**

The authors thank Drs. Naoki Shimo, Takashi Katsura, Hiroyo Ninomiya, Kazuo Omori, Yasuki Nagai, Naohiro Taya, Hirotaka Watanabe, Shigero Hosoe, and Tomoyo Takamori (Department of Metabolic Medicine, Graduate School of Medicine, Osaka University, Osaka, Japan), Prof. Munehide Matsuhisa and Dr. Akio Kuroda (Diabetes Therapeutics and Research Center, Tokushima University, Tokushima, Japan), Drs. Ken Kato, Toko Oida, Takafumi Masuda, and Saki Kawamoto (National Hospital Organization Osaka National Hospital, Osaka, Japan), Dr. Ayaha Kawashima (Kanda Naika Clinic, Osaka, Japan), and Dr. Fumiyo Kubo (Yao Municipal Hospital, Osaka, Japan) for their assistance in clinical examinations.

Supplemental Figure 1.

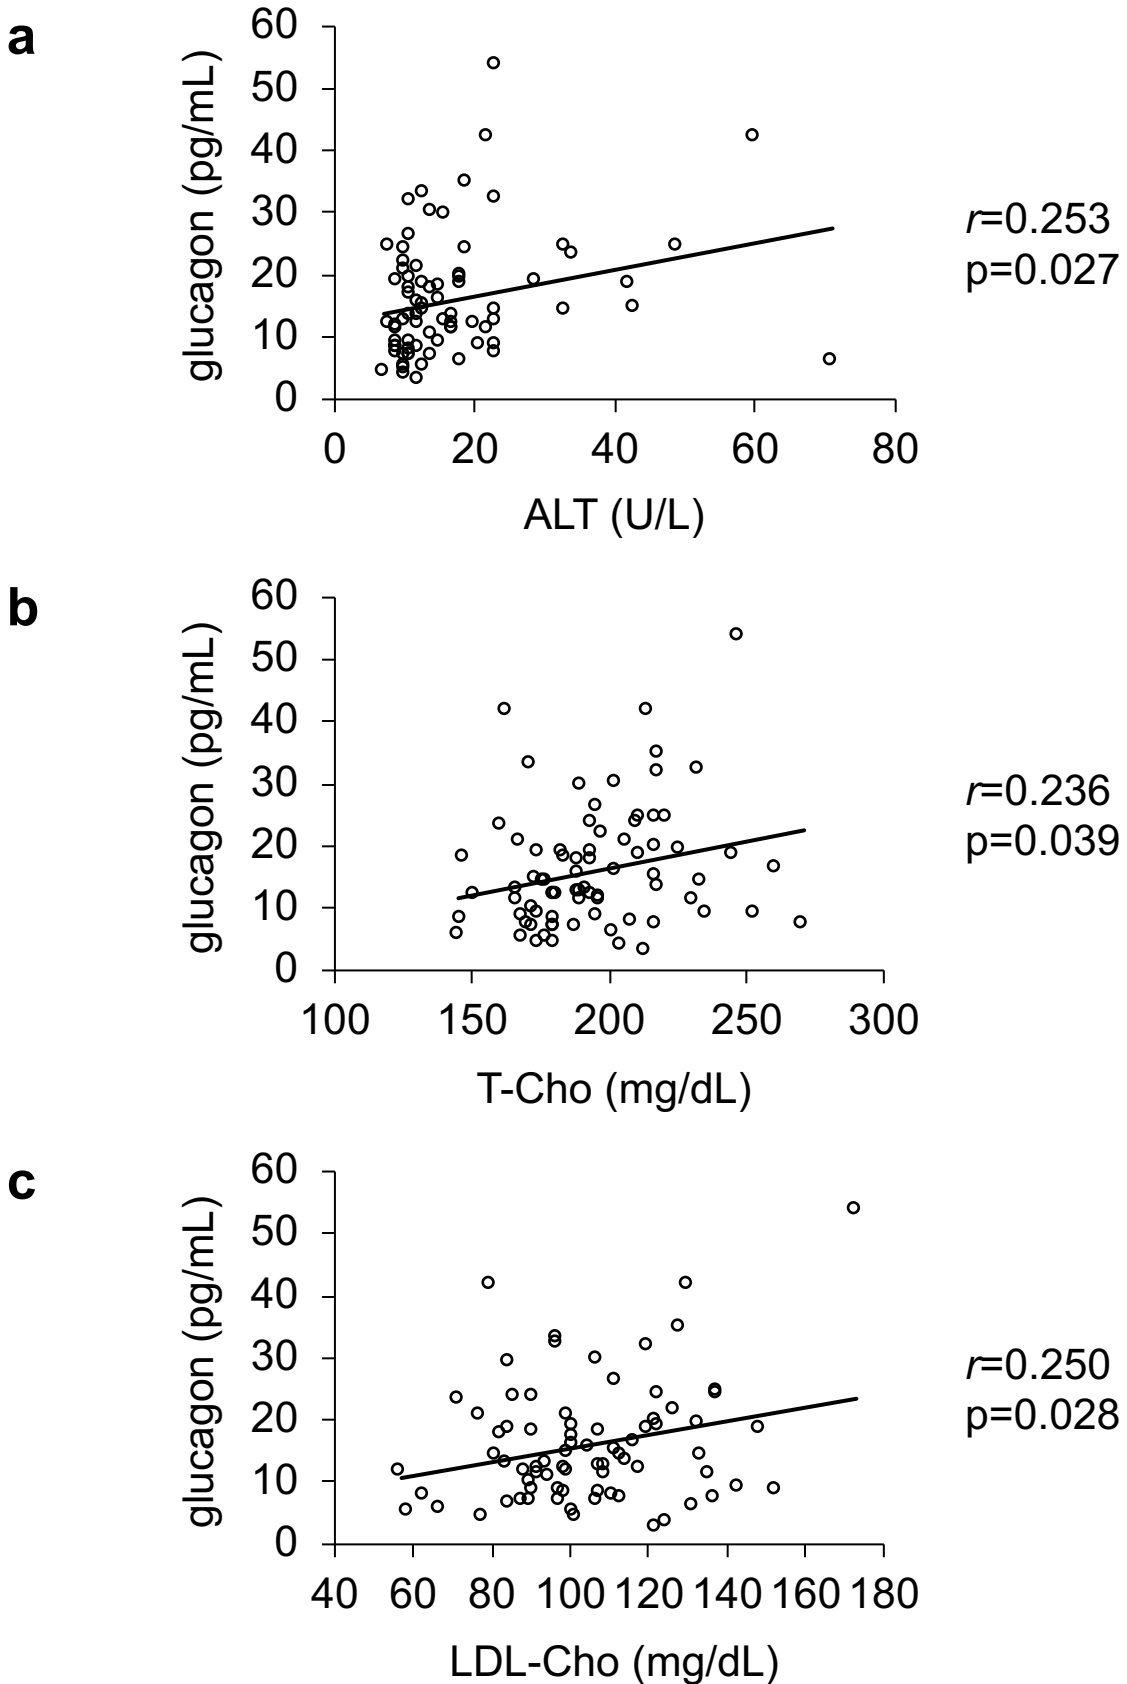

**Supplemental Figure 1.** Values for clinical parameters and plasma glucagon in the patients with type 1 diabetes in 2018 (n=77). Circles indicate individual samples and the line indicates the approximate straight line. Statistical analysis for correlation was carried out using Pearson's univariate test.

**Supplemental Figure 2.**

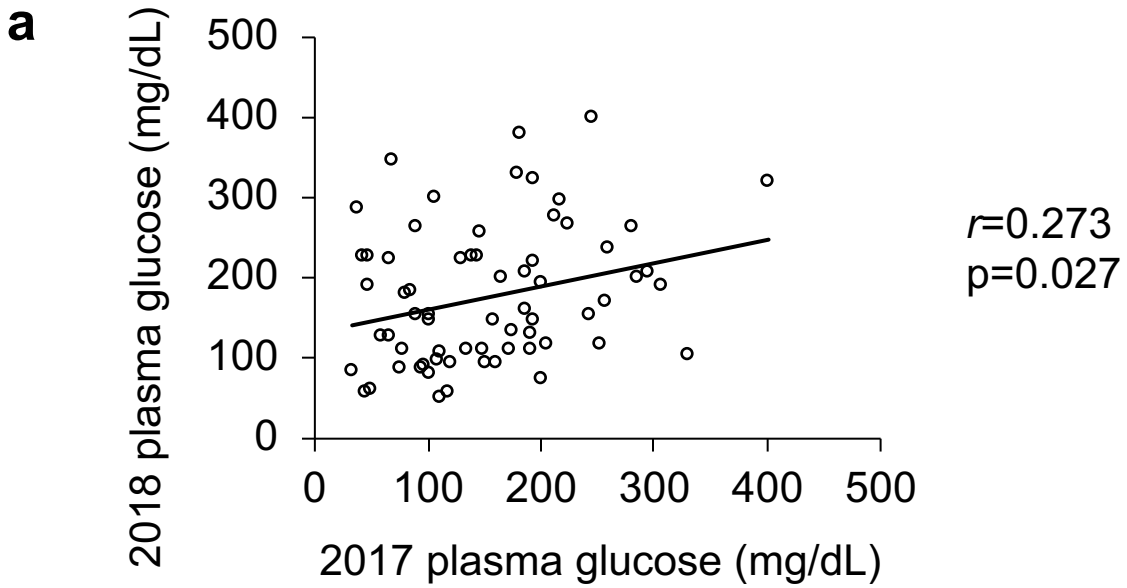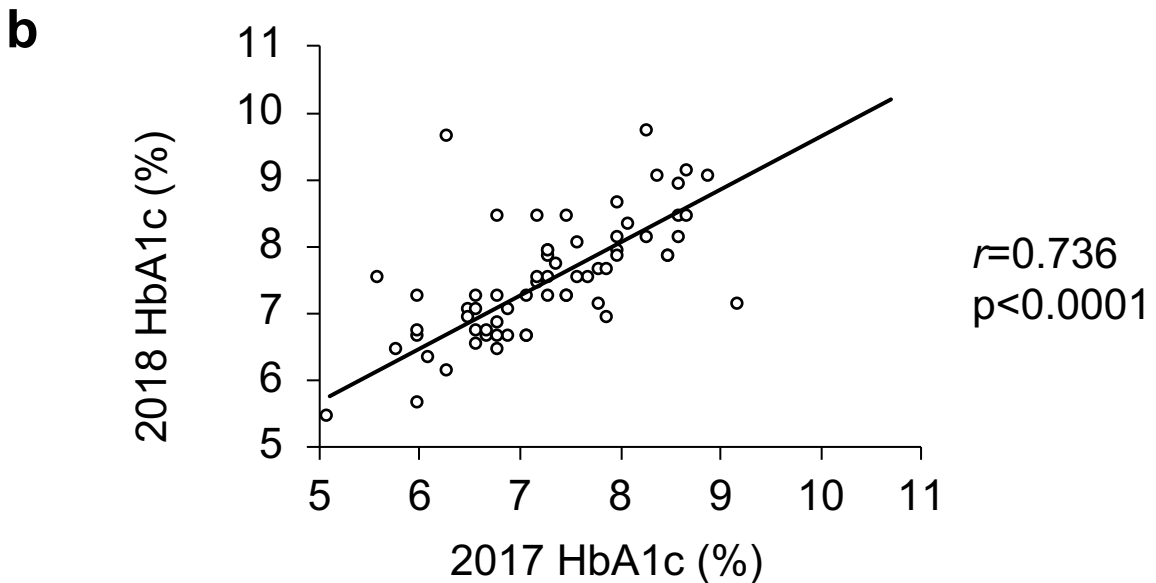

**Supplemental Figure 2.** Values for plasma glucose and HbA1c in the annual checkups of 2017 and 2018 for patients with type 1 diabetes (n=66). Circles indicate individual samples and the line indicates the approximate straight line. Statistical analysis for correlation was carried out using Pearson's univariate test.

**Supplemental Table 1.**

|            | 2017 GCG                                        | 2017 PG                                        | 2017 HbA1c                                         | 2017 BUN                                        | 2017 ALT                                           | 2017 TC                                            | 2017 LDL                                           |
|------------|-------------------------------------------------|------------------------------------------------|----------------------------------------------------|-------------------------------------------------|----------------------------------------------------|----------------------------------------------------|----------------------------------------------------|
| 2017 GCG   |                                                 |                                                |                                                    |                                                 |                                                    |                                                    |                                                    |
| 2017 PG    | <i>r</i> =0.079<br><i>p</i> =0.529              |                                                |                                                    |                                                 |                                                    |                                                    |                                                    |
| 2017 HbA1c | <i>r</i> =0.020<br><i>p</i> =0.877              | <b><i>r</i>=0.292</b><br><b><i>p</i>=0.019</b> |                                                    |                                                 |                                                    |                                                    |                                                    |
| 2017 BUN   | <b><i>r</i>=0.335</b><br><b><i>p</i>=0.006</b>  | <i>r</i> =0.109<br><i>p</i> =0.383             | <i>r</i> =0.024<br><i>p</i> =0.850                 |                                                 |                                                    |                                                    |                                                    |
| 2017 ALT   | <i>r</i> =0.182<br><i>p</i> =0.143              | <i>r</i> =0.016<br><i>p</i> =0.897             | <i>r</i> =0.108<br><i>p</i> =0.392                 | <b><i>r</i>=0.259</b><br><b><i>p</i>=0.036</b>  |                                                    |                                                    |                                                    |
| 2017 TC    | <i>r</i> =0.116<br><i>p</i> =0.356              | <i>r</i> =0.111<br><i>p</i> =0.377             | <i>r</i> =0.198<br><i>p</i> =0.115                 | <i>r</i> =0.008<br><i>p</i> =0.951              | <i>r</i> =0.144<br><i>p</i> =0.247                 |                                                    |                                                    |
| 2017 LDL   | <i>r</i> =0.020<br><i>p</i> =0.874              | <i>r</i> =0.273<br><i>p</i> =0.104             | <b><i>r</i>=0.375</b><br><b><i>p</i>=0.002</b>     | <i>r</i> =0.101<br><i>p</i> =0.422              | <i>r</i> =0.222<br><i>p</i> =0.073                 | <b><i>r</i>=0.763</b><br><b><i>p</i>&lt;0.0001</b> |                                                    |
|            | 2018 GCG                                        | 2018 PG                                        | 2018 HbA1c                                         | 2018 BUN                                        | 2018 ALT                                           | 2018 TC                                            | 2018 LDL                                           |
| 2018 GCG   | <b><i>r</i>=0.407</b><br><b><i>p</i>=0.0007</b> |                                                |                                                    |                                                 |                                                    |                                                    |                                                    |
| 2018 PG    |                                                 | <b><i>r</i>=0.273</b><br><b><i>p</i>=0.027</b> |                                                    |                                                 |                                                    |                                                    |                                                    |
| 2018 HbA1c |                                                 |                                                | <b><i>r</i>=0.736</b><br><b><i>p</i>&lt;0.0001</b> |                                                 |                                                    |                                                    |                                                    |
| 2018 BUN   |                                                 |                                                |                                                    | <b><i>r</i>=0.411</b><br><b><i>p</i>=0.0006</b> |                                                    |                                                    |                                                    |
| 2018 ALT   |                                                 |                                                |                                                    |                                                 | <b><i>r</i>=0.590</b><br><b><i>p</i>&lt;0.0001</b> |                                                    |                                                    |
| 2018 TC    |                                                 |                                                |                                                    |                                                 |                                                    | <b><i>r</i>=0.486</b><br><b><i>p</i>&lt;0.0001</b> |                                                    |
| 2018 LDL   |                                                 |                                                |                                                    |                                                 |                                                    |                                                    | <b><i>r</i>=0.625</b><br><b><i>p</i>&lt;0.0001</b> |
|            | 2018 GCG                                        | 2018 PG                                        | 2018 HbA1c                                         | 2018 BUN                                        | 2018 ALT                                           | 2018 TC                                            | 2018 LDL                                           |
| 2018 GCG   |                                                 |                                                |                                                    |                                                 |                                                    |                                                    |                                                    |
| 2018 PG    | <b><i>r</i>=0.287</b><br><b><i>p</i>=0.020</b>  |                                                |                                                    |                                                 |                                                    |                                                    |                                                    |
| 2018 HbA1c | <i>r</i> =0.075<br><i>p</i> =0.551              | <b><i>r</i>=0.329</b><br><b><i>p</i>=0.007</b> |                                                    |                                                 |                                                    |                                                    |                                                    |
| 2018 BUN   | <b><i>r</i>=0.305</b><br><b><i>p</i>=0.013</b>  | <i>r</i> =0.135<br><i>p</i> =0.281             | <i>r</i> =0.126<br><i>p</i> =0.315                 |                                                 |                                                    |                                                    |                                                    |
| 2018 ALT   | <b><i>r</i>=0.258</b><br><b><i>p</i>=0.036</b>  | <i>r</i> =0.236<br><i>p</i> =0.057             | <b><i>r</i>=0.271</b><br><b><i>p</i>=0.028</b>     | <i>r</i> =0.189<br><i>p</i> =0.128              |                                                    |                                                    |                                                    |
| 2018 TC    | <b><i>r</i>=0.314</b><br><b><i>p</i>=0.010</b>  | <i>r</i> =0.087<br><i>p</i> =0.487             | <b><i>r</i>=0.416</b><br><b><i>p</i>=0.0005</b>    | <i>r</i> =0.078<br><i>p</i> =0.534              | <i>r</i> =0.168<br><i>p</i> =0.178                 |                                                    |                                                    |
| 2018 LDL   | <b><i>r</i>=0.324</b><br><b><i>p</i>=0.008</b>  | <i>r</i> =0.225<br><i>p</i> =0.069             | <b><i>r</i>=0.504</b><br><b><i>p</i>&lt;0.0001</b> | <i>r</i> =0.193<br><i>p</i> =0.120              | <b><i>r</i>=0.314</b><br><b><i>p</i>=0.010</b>     | <b><i>r</i>=0.767</b><br><b><i>p</i>&lt;0.0001</b> |                                                    |

**Supplemental Table 1.** Results of Pearson's univariate tests in the annual checkups of 2017 and 2018 for patients with type 1 diabetes (n=66). GCG, glucagon; PG, plasma glucose; BUN, blood urea nitrogen; ALT, alanine transaminase; TC, total-cholesterol; LDL, low-density lipoprotein cholesterol.
